# Supplementary material for: Revisiting the UK Genetic Severity Score for NF2: a proposal for adding functional information
Source: bioRxiv or medRxiv preprint supplement (doi:10.1101/2020.10.22.20216614), 2020-10-26

# PCA – Biplot

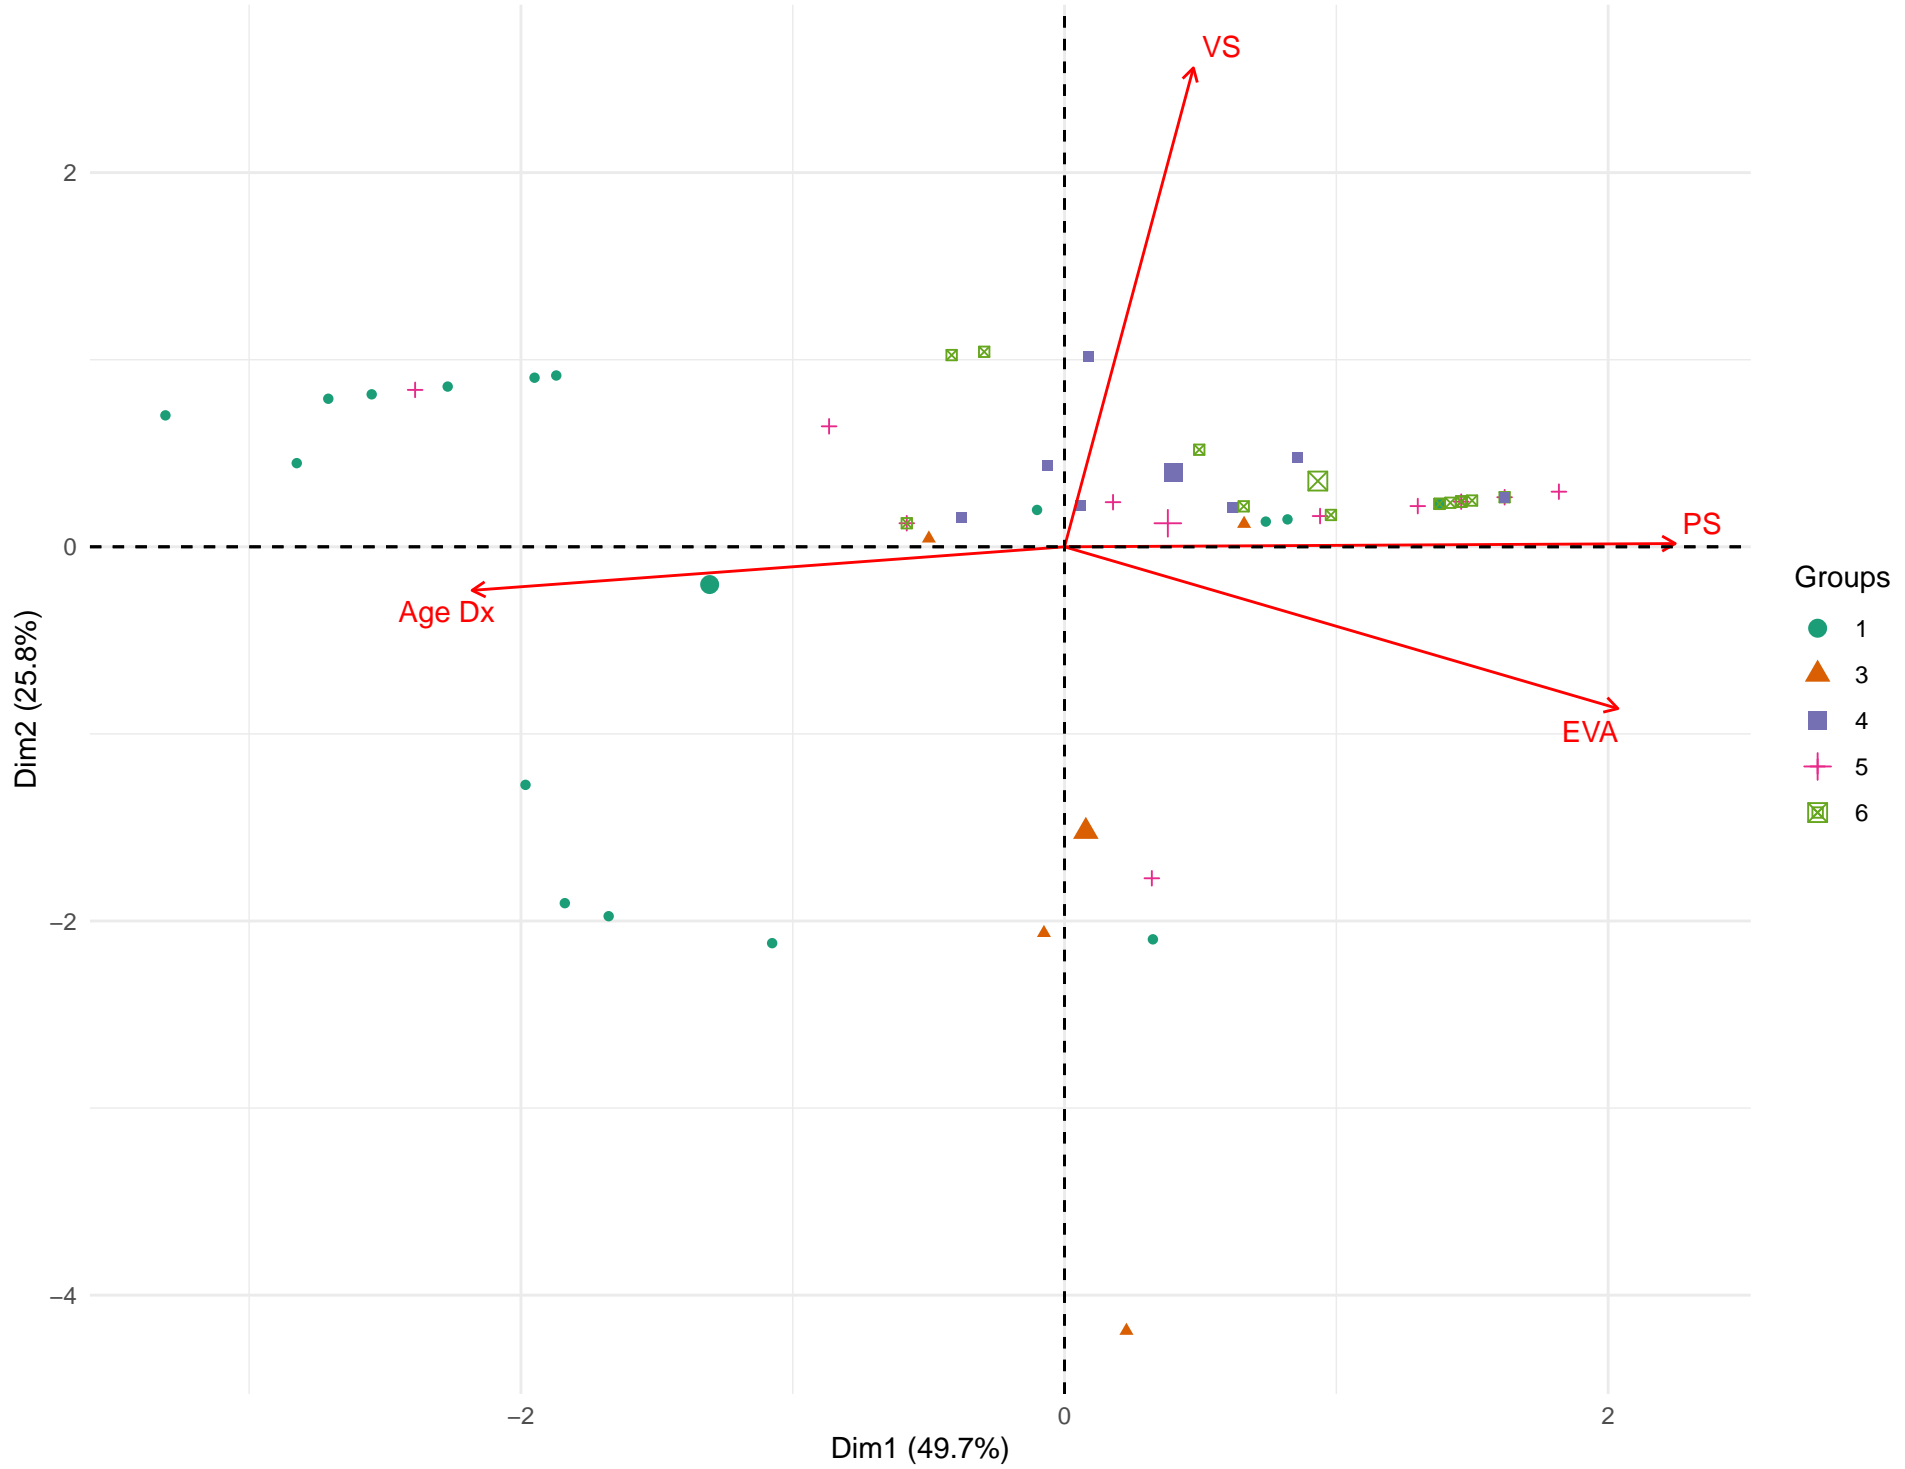

Supplement: Supplementary file [file media-3.pdf]
