# Supplementary material for: Revisiting the UK Genetic Severity Score for NF2: a proposal for adding functional information
Source: bioRxiv or medRxiv preprint supplement (doi:10.1101/2020.10.22.20216614), 2020-10-26

c.784C>T

NM 000268.3

G A A A T C C G A A A C A T

G A A A T C C G A A A C A T

G A A A T C C G A A A C A T

Fwd

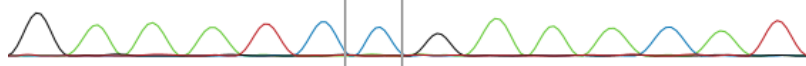

511 Blood

G A A A T C C G A A A C A T

Rev

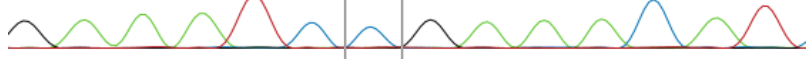

G A A A T C C G A A A C A T

Fwd

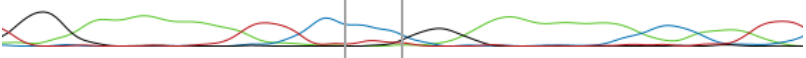

511 Fibroblasts

G A A A T C Y G A A A C A T

Rev

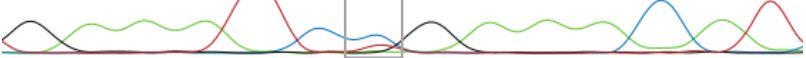

Supplement: Supplementary file [file media-4.pdf]
