# Supplementary material for: Revisiting the UK Genetic Severity Score for NF2: a proposal for adding functional information
Source: bioRxiv or medRxiv preprint supplement (doi:10.1101/2020.10.22.20216614), 2020-10-26
Supplement: Supplementary file [file media-6.pdf]

**Supplementary Table 2. Major interventions in relation to Genetic Severity Score**

| Genetic Severity                                        |                                                             | 1 Tissue Mosaic                                         | 2A Mild       | 2B Moderate   | 3 Severe     | Statistics                    |
|---------------------------------------------------------|-------------------------------------------------------------|---------------------------------------------------------|---------------|---------------|--------------|-------------------------------|
| N (%)                                                   | Proportion of patients within                               |                                                         |               |               |              |                               |
|                                                         | VS surgery                                                  | 7 (36,84%)                                              | 9 (100%)      | 5 (50%)       | 10 (71,4%)   | $\chi^2(1) = 4.08, p = 0.043$ |
|                                                         | Non-VS intracranial surgery                                 | 2 (10,5%)                                               | 0 (0%)        | 3 (30%)       | 5 (35,7%)    | $\chi^2(1) = 3.99, p = 0.045$ |
|                                                         | Spinal surgery                                              | 6 (31,58%)                                              | 1 (11,11%)    | 4 (40%)       | 2 (14,3%)    | $\chi^2(1) = 0.72, p = 0.39$  |
|                                                         | Shunt surgery                                               | 0 (0%)                                                  | 0 (0%)        | 0 (0%)        | 1 (7,1%)     | $\chi^2(1) = 1.73, p = 0.18$  |
|                                                         | Radiotherapy                                                | 1 (5,26%)                                               | 3 (33,33%)    | 3 (30%)       | 8 (57,1%)    | $\chi^2(1) = 8.9, p = 0.002$  |
|                                                         | Bevacizumab                                                 | 0 (0%)                                                  | 1 (11,11%)    | 4 (40%)       | 6 (42,9%)    | $\chi^2(1) = 10.2, p = 0.001$ |
| Total number of major interventions per person, grouped | 0                                                           | 7 (36,84%)                                              | 1 (11,11%)    | 0 (0%)        | 2 (14,3%)    | $\chi^2(1) = 4.08, p = 0.043$ |
|                                                         | 1                                                           | 5 (26,31%)                                              | 2 (22,22%)    | 3 (30%)       | 2 (14,3%)    | $\chi^2(1) = 0.05, p = 0.82$  |
|                                                         | 2                                                           | 2 (10,52%)                                              | 4 (44,44%)    | 2 (20%)       | 2 (14,3%)    | $\chi^2(1) = 0, p = 1$        |
|                                                         | 3                                                           | 1 (5,26%)                                               | 3 (33,33%)    | 1 (10%)       | 2 (14,3%)    | $\chi^2(1) = 0.15, p = 0.69$  |
|                                                         | 4 or more                                                   | 3 (15,79%)                                              | 0 (0%)        | 4 (40%)       | 6 (42,9%)    | $\chi^2(1) = 4.10, p = 0.042$ |
|                                                         | Mean (SD)                                                   | Total number of major interventions per person, grouped | 1,53 (1,91)   | 1,90 (0,99)   | 3,09 (2,34)  | 3,79 (3,36)                   |
|                                                         | Number of total surgeries                                   | 1,53 (2,07)                                             | 1,50 (0,71)   | 1,91 (1,64)   | 2,64 (2,98)  | $r_s(50) = 0.18, p = 0.19$    |
|                                                         | Age at first radiotherapy session                           | 23                                                      | 37 (9,64)     | 30,33 (6,66)  | 24,29 (8,16) | $r_s(12) = -0.42, p = 0.13$   |
|                                                         | Age started bevacizumab                                     | -                                                       | 32            | 26,67 (14,57) | 23,67 (8,48) | $r_s(8) = -0.26, p = 0.46$    |
|                                                         | Age at first surgery                                        | 35,44 (13,36)                                           | 29,78 (12,05) | 26,67 (7,57)  | 20,80 (7,73) | $r_s(35) = -0.47, p = 0.003$  |
|                                                         | Age at first major intervention                             | 34,20 (13,20)                                           | 29,78 (12,05) | 25,55 (8,55)  | 20,55 (7,89) | $r_s(39) = -0.47, p = 0.001$  |
|                                                         | Ratio of total number of major interventions to current age | 0,03 (0,04)                                             | 0,04 (0,02)   | 0,08 (0,06)   | 0,13 (0,11)  | $r_s(50) = 0.49, p < 0.001$   |
