# Supplementary material for: Revisiting the UK Genetic Severity Score for NF2: a proposal for adding functional information
Source: bioRxiv or medRxiv preprint supplement (doi:10.1101/2020.10.22.20216614), 2020-10-26
Supplement: Supplementary file [file media-7.pdf]

**Supplementary Table 3. Phenotype quantification**

| <b>Phenotypic feature</b>                      |                                                                           | <b>Value</b> |
|------------------------------------------------|---------------------------------------------------------------------------|--------------|
| Age at diagnosis                               | < 25 years                                                                | 3            |
|                                                | < 35 years                                                                | 2            |
|                                                | > 35 years                                                                | 1            |
| Vestibular Schwannoma                          | Unilateral                                                                | 1            |
|                                                | Bilateral                                                                 | 2            |
| Peripheral Schwannomas                         | Single                                                                    | 1            |
|                                                | Multiple                                                                  | 2            |
| Extravestibular affection<br>(Spinal/Cerebral) | Spinal and cerebral injury or spinal/cerebral<br>different type of injury | 3            |
|                                                | Cerebral or Spinal multiple injuries                                      | 2            |
|                                                | Single brain or spinal injury                                             | 1            |
