# Supplementary material for: Revisiting the UK Genetic Severity Score for NF2: a proposal for adding functional information
Source: bioRxiv or medRxiv preprint supplement (doi:10.1101/2020.10.22.20216614), 2020-10-26
Supplement: Supplementary file [file media-8.pdf]

Supplementary Table 4. Revising mutation associated pathogenicity according to GSS

| NF2-causing variant                      |                |                    | GSS | Inheritance | Mosaicism       |                     | Phenotype Quantification | Merlin NPE levels | pERK NPE levels | Reasoning                                                 |
|------------------------------------------|----------------|--------------------|-----|-------------|-----------------|---------------------|--------------------------|-------------------|-----------------|-----------------------------------------------------------|
| cDNA (NM_00268.3)                        | Exon           | Predicted protein  |     |             | % in blood      | Only in tissue      |                          |                   |                 |                                                           |
| c.169C>T & c.810+2T>A                    | exon 2; exon 8 | p.(Arg57*) & p.(?) | 1A  | Sporadic    | Not detected    | One tumor analyzed  | 3                        | 3,66129319        | 4,0767212       | Mosaic patient. Very mild phenotype                       |
| c.1341-25_1377del62 + LOH                | exon 13        | p.(?)              | 1A  | Sporadic    | Not detected    | One tumor analyzed  | 3                        |                   |                 | Mosaic patient. Very mild phenotype                       |
| Genetic test (NGS) in blood inconclusive |                |                    | 1A  | Sporadic    |                 |                     | 3                        |                   |                 | Mosaic patient. Very mild phenotype                       |
| Genetic test (NGS) in blood inconclusive |                |                    | 1A  | Sporadic    |                 |                     | 3                        |                   |                 | Mosaic patient. Very mild phenotype                       |
| Genetic test (NGS) in blood inconclusive |                |                    | 1A  | Sporadic    |                 |                     | 4                        |                   |                 | Mosaic patient. Very mild phenotype                       |
| Genetic test (NGS) in blood inconclusive |                |                    | 1A  | Sporadic    |                 |                     | 4                        |                   |                 | Mosaic patient. Very mild phenotype                       |
| Genetic test (NGS) in blood inconclusive |                |                    | 1A  | Sporadic    |                 |                     | 4                        |                   |                 | Mosaic patient. Very mild phenotype                       |
| Genetic test in blood inconclusive       |                |                    | 1A  | Sporadic    |                 |                     | 5                        |                   |                 | Mosaic patient. Mild phenotype                            |
| exon 6 deletion + LOH                    | exon 6         | p.(Val173Glyfs*2)  | 1A  | Sporadic    | Not detected    | One tumor analyzed  | 5                        |                   |                 | Mosaic patient. Mild phenotype                            |
| c.169C>T + LOH                           | exon2          | p.(Arg57*)         | 1A  | Sporadic    | Not detected    | One tumor analyzed  | 7                        |                   |                 | <b>Mosaic patient. Unexpected mild-moderate phenotype</b> |
| Genetic test in blood inconclusive       |                |                    | 1A  | Sporadic    |                 |                     | 8                        |                   |                 | <b>Mosaic patient. Unexpected moderate phenotype</b>      |
| Genetic test (NGS) in blood inconclusive |                |                    | 1A  | Sporadic    |                 | Mosaic suspicion be | 8                        |                   |                 | <b>Mosaic patient. Unexpected moderate phenotype</b>      |
| c.592C>T + LOH                           | exon 6         | p.(Arg198*)        | 1A  | Sporadic    | 2% in fibroblas | One tumor analyzed  | 9                        | 3,57902164        | 9,08179524      | <b>Mosaic patient. Unexpected severe phenotype</b>        |

|                                                  |                                              |                          |    |          |                      |                       |    |            |            |                                                                                                                                    |
|--------------------------------------------------|----------------------------------------------|--------------------------|----|----------|----------------------|-----------------------|----|------------|------------|------------------------------------------------------------------------------------------------------------------------------------|
| c.112G>T + LOH                                   | exon 1                                       | P.(Glu38*)               | 1A | Sporadic | Not detected         | One tumor analyzed    | 10 |            |            | <b>Mosaic patient. Unexpected severe phenotype</b>                                                                                 |
| Genetic test (NGS) in blood inconclusive         |                                              |                          | 1A | Sporadic |                      |                       | 10 |            |            | <b>Mosaic patient. Unexpected severe phenotype</b>                                                                                 |
| exons 2-3 deletion                               | exon 2 & 3                                   | p.(?)                    | 1B | Sporadic | Not detected         | Two tumors analyzed   | 7  | 2,28870175 | 3,0376054  | <b>Mosaic patient. Unexpected mild-moderate phenotype</b>                                                                          |
| c.970C>T                                         | exon 10                                      | p.(Gln324*)              | 1B | Sporadic | Not detected         | Two tumors analyzed   | 7  | 3,42502203 | 0,33804115 | <b>Mosaic patient. Unexpected mild-moderate phenotype</b>                                                                          |
| c.592C>T                                         | exon 6                                       | p.(Arg198*)              | 1B | Sporadic | Not detected         | Three tumors analyzed | 8  | 4,58749871 | 4,55488321 | <b>Mosaic patient. Unexpected moderate phenotype</b>                                                                               |
| c.592C>T                                         | exon 6                                       | p.(Arg198*)              | 1B | Sporadic | Not detected         | Two tumors analyzed   | 7  |            |            | <b>Mosaic patient. Unexpected mild-moderate phenotype</b>                                                                          |
| c.1747A>G;<br>r.1575_1747del<br>Ring 22          | exon 15                                      | p.(Lys525Asnfs*19)       | 2A | Sporadic |                      |                       | 3  | 0,65585897 | 1,75666641 | Splicing variant at exon 15. Mild phenotype                                                                                        |
|                                                  |                                              |                          | 2A | Sporadic |                      |                       | 3  |            |            |                                                                                                                                    |
| exons 14-17 deletion                             | exons 14-17                                  | p.(?)                    | 2A | Sporadic | 20% (MLPA kit P044)  |                       | 7  | 0,82372417 | 0,34586901 | <b>Large deletion excluding promoter in mosaicism. Unexpected mild-moderate phenotype. Merlin and pERK levels below threshold.</b> |
| c.287T>C                                         | exon 3                                       | p.(Phe96Ser)             | 2A | Sporadic |                      |                       | 7  | 2,18077529 | 2,23406472 | <b>Missense variant. Unexpected mild-moderate phenotype.</b>                                                                       |
| Whole NF2 gene deletion in mosaicism             | whole gene                                   |                          | 2A | Sporadic | ~10% (MLPA kit P044) |                       | 7  |            |            | <b>Large deletion including promoter in mosaicism. Unexpected mild-moderate phenotype.</b>                                         |
| exons 1-5 deletion and 47 kb upstream (NIPSNAP1) | exon 1-5                                     | Merlin synthesis altered | 2A | Familial |                      |                       | 7  |            |            | <b>Large deletion including promoter. Unexpected mild-moderate phenotype.</b>                                                      |
| c.1446_1477insNG_009057.1:g.74239_74405          | Deep intronic mutation between exons 13 - 14 | p.(Pro482Profs*39)       | 2A | Sporadic |                      |                       | 8  | 0,41335449 | 4,7636402  | <b>Splicing variant at exon 14. Unexpected moderate phenotype. pERK levels above threshold.</b>                                    |

|                                                   |                   |                          |    |          |                                     |  |    |            |            |                                                                                                                                                                 |
|---------------------------------------------------|-------------------|--------------------------|----|----------|-------------------------------------|--|----|------------|------------|-----------------------------------------------------------------------------------------------------------------------------------------------------------------|
| exons 1-5 deletion and 47 kb upstream (NIPSNAP1)  | exon 1-5          | Merlin synthesis altered | 2A | Familial |                                     |  | 9  | 1,68851611 | 5,7267768  | <b>Large deletion including promoter. Unexpected severe phenotype.</b>                                                                                          |
| c.810+1dupG                                       | exon 8            | p.(Phe271Val4fs*)        | 2A | Sporadic |                                     |  | 10 | 0,7651892  | 0,66179798 | <b>Splicing variant at exon 8. Unexpected severe phenotype. Merlin and pERK levels below threshold.</b>                                                         |
| exons 15-16 deletion; r.1575_1747del              | exon15-16         | p.(Lys525Asnfs*19)       | 2B | Sporadic |                                     |  | 5  | 0,98880623 | 5,64437297 | <b>Large deletion excluding promoter. Unexpected mild phenotype. At functional level this deletion alters exon 15 splicing. pERK levels are above threshold</b> |
| c.169C>T                                          | exon 2            | p.(Arg57*)               | 2B | Sporadic | Detected at 7% in blood (NGS)       |  | 7  |            |            | Nonsense variant at mosaicism. Mild-moderate phenotype                                                                                                          |
| exons 5-17 deletion and downstream CABP7 deletion | exons 5-17        | p.(?)                    | 2B | Sporadic |                                     |  | 8  | 1,55439894 | 2,65118931 | Large deletion excluding promoter. Moderate phenotype. pERK levels are above threshold                                                                          |
| c.115_363del                                      | Exon 2&3 skipping | p.(Met39_Gln121del)      | 2B | Sporadic |                                     |  | 9  | 1,48734671 | 3,14955982 | Splicing variant at exon 2&3. Unexpected severe phenotype. pERK levels above threshold.                                                                         |
| c.241-13T>A                                       | exon 3            | p.(Val81Glnfs*45)        | 2B | Sporadic |                                     |  | 9  | 2,06863943 | 1,09999436 | Splicing variant at exon 3. Unexpected severe phenotype. pERK levels below threshold.                                                                           |
| c.241-9A>G                                        | exon 3            | p.(Val81Phefs*44)        | 2B | Sporadic |                                     |  | 10 | 1,57827175 | 2,46664781 | Splicing variant at exon 3. Unexpected severe phenotype. pERK levels below threshold.                                                                           |
| c.784C>T                                          | exon 8            | p.(Arg262*)              | 2B | Sporadic | Detected at ~ 10% in fibroblasts, n |  | 10 | 2,56486969 | 0,81433044 | <b>Nonsense variant at mosaicism. Unexpected severe phenotype. pERK levels below threshold</b>                                                                  |

|                        |        |                   |    |                 |                                      |  |    |            |            |                                                                                         |
|------------------------|--------|-------------------|----|-----------------|--------------------------------------|--|----|------------|------------|-----------------------------------------------------------------------------------------|
| c.169C>T               | exon 2 | p.(Arg67*)        | 2B | Sporadic        | 5,6% in blood (NGS)                  |  | 10 | 2,71920859 | 1,74534982 | Nonsense variant at mosaicism. Unexpected severe phenotype. pERK levels below threshold |
| c.586C>T               | exon 6 | p.(Arg196*)       | 2B | Sporadic        | Detected at >20% in blood (external) |  | 10 |            |            | Nonsense variant at mosaicism. Unexpected severe phenotype                              |
| c.448-2A>G             | exon 5 | p.(?), splicing   | 2B | Sporadic        |                                      |  | 10 |            |            | Splicing variant at exon 3. Unexpected severe phenotype                                 |
| c.1096_1102del7        | exon11 | p.(Glu366Glnfs*7) | 3  | Familial, index |                                      |  | 7  | 1,28967814 | 1,45881049 | Nonsense variant. Unexpected mild-moderate phenotype. Protein levels below threshold    |
| c.784C>T               | exon 8 | p.(Arg262*)       | 3  | Sporadic        |                                      |  | 8  | 1,64843072 | 1,12977722 | Nonsense variant. Unexpected moderate phenotype. Protein levels below threshold         |
| c.784C>T               | exon 8 | p.(Arg262*)       | 3  | Sporadic        |                                      |  | 9  | 1,72710678 | 0,74796226 | Nonsense variant. Severe phenotype. Protein levels below threshold                      |
| c.634C>T               | exon 7 | p.(Gln212*)       | 3  | Sporadic        |                                      |  | 9  |            |            | Nonsense variant. Severe phenotype                                                      |
| c.380_396dupTAGATGAAAA | exon 4 | p.(Cys133*)       | 3  | Sporadic        |                                      |  | 10 | 0,6773879  | 0,81003198 | Nonsense variant. Severe phenotype. Protein levels below threshold                      |

|                        |                   |                    |   |          |  |  |    |            |            |                                                                             |
|------------------------|-------------------|--------------------|---|----------|--|--|----|------------|------------|-----------------------------------------------------------------------------|
| c.1282C>T              | exon 12           | p.(Gln428*)        | 3 | Sporadic |  |  | 10 | 0,80455913 | 0,66749818 | Nonsense variant.<br>Severe phenotype.<br>Protein levels below<br>threshold |
| c.432C>G               | exon 4            | p.(Tyr144*)        | 3 | Sporadic |  |  | 10 | 1,04771615 | 1,90213891 | Nonsense variant.<br>Severe phenotype.<br>Protein levels below<br>threshold |
| c.784C>T               | exon 8            | p./Arg262*)        | 3 | Sporadic |  |  | 10 | 1,0694117  | 1,74014287 | Nonsense variant.<br>Severe phenotype.<br>Protein levels below<br>threshold |
| c.784C>T               | exon 8            | p.(Arg262*)        | 3 | Sporadic |  |  | 10 | 1,17909458 | 0,32191149 | Nonsense variant.<br>Severe phenotype.<br>Protein levels below<br>threshold |
| c.520dupA              | exon 6            | p.(Ile174Asnfs*29) | 3 | Sporadic |  |  | 10 | 1,23139075 | 0,29106762 | Nonsense variant.<br>Severe phenotype.<br>Protein levels below<br>threshold |
| c.1334_1337delAGA<br>G | Small<br>Deletion | p.(Glu445Glyfs*9)  | 3 | Sporadic |  |  | 10 |            |            | Nonsense variant.<br>Severe phenotype                                       |
| c.1396C>T              | exon 13           | p.(Arg466*)        | 3 | Sporadic |  |  | 10 |            |            | Nonsense variant.<br>Severe phenotype                                       |
