# Supplementary material for: Revisiting the UK Genetic Severity Score for NF2: a proposal for adding functional information
Source: bioRxiv or medRxiv preprint supplement (doi:10.1101/2020.10.22.20216614), 2020-10-26
Supplement: Supplementary file [file media-9.pdf]

**Supplementary Table 5. Demographic data according to Functional Genetic Severity Score**

| Functional Genetic Severity Score |                          | 1             | 2          | 3            | 4             | 5             | 6             | Correlation                  |
|-----------------------------------|--------------------------|---------------|------------|--------------|---------------|---------------|---------------|------------------------------|
| N (% total)                       | Number of patients       | 16 (30,7%)    | 0          | 4 (7,7%)     | 10 (19,23%)   | 8 (15,38%)    | 14 (26,9%)    |                              |
| N (% gender)                      | Gender                   | Male          | 12 (36,4%) | 3 (9,1%)     | 6 (18,18%)    | 3 (9%)        | 9 (27,3%)     |                              |
|                                   |                          | Female        | 4 (21,1%)  | 2 (10,5%)    | 4 (21,1%)     | 4 (21,1%)     | 5 (26,3%)     | $\chi^2(4) = 1.81, p = 0.77$ |
| Mean (SD)                         | Age at diagnosis         | 40,94 (16,11) |            | 36,6 (12,99) | 23 (7,37)     | 24 (12,90)    | 18,79 (6,5)   | $r_s(50) = -0.64, p < 0.001$ |
|                                   | Current age              | 52,25 (15,56) |            | 46,8 (18,43) | 41,56 (12,76) | 36,88 (12,91) | 30,79 (12,07) | $r_s(50) = -0.54, p < 0.001$ |
|                                   | Years since diagnosis    | 11,25 (6,86)  |            | 10,2 (12,21) | 18,56 (12,09) | 12,88 (6,69)  | 12 (8,26)     | $r_s(50) = 0.04, p = 0.75$   |
|                                   | Age at NF2-related death |               |            |              | 53            | 40            | 42            |                              |
| N (% score category)              | NF2-related deaths       |               |            |              | 1 (10%)       | 1 (12,5%)     | 1 (7,2%)      |                              |
|                                   | Familial NF2             | 0 (0%)        |            | 1 (20%)      | 3 (30%)       | 0 (0%)        | 3 (21,4%)     |                              |
|                                   | Sporadic NF2             | 16 (100%)     |            | 4 (80%)      | 7 (70%)       | 7 (87,5%)     | 11 (78,6%)    | $\chi^2(4) = 7.73, p = 0.10$ |
