# Supplementary material for: Revisiting the UK Genetic Severity Score for NF2: a proposal for adding functional information
Source: bioRxiv or medRxiv preprint supplement (doi:10.1101/2020.10.22.20216614), 2020-10-26
Supplement: Supplementary file [file media-10.pdf]

| Supplementary Table 6. Tumor burden, presence of ocular features and hearing outcome according to Functional Genetic Severity Score |                    |                               |               |               |              |              |               |               |                              |
|-------------------------------------------------------------------------------------------------------------------------------------|--------------------|-------------------------------|---------------|---------------|--------------|--------------|---------------|---------------|------------------------------|
| Functional Genetic Severity Score                                                                                                   |                    | 1                             | 2             | 3             | 4            | 5            | 6             | Statistics    |                              |
| N (% total)                                                                                                                         | Number of patients | 16                            | 0             | 4             | 10           | 8            | 14            |               |                              |
| Tumor load                                                                                                                          | N (%)              | Bilateral VS                  | 11 (68,7%)    | 0 (0%)        | 3 (75%)      | 10 (100%)    | 8 (100%)      | 14 (100%)     | $\chi^2(1) = 8.9, p = 0.002$ |
|                                                                                                                                     |                    | Unilateral VS                 | 5 (31,2%)     | 0 (0%)        | 1 (25%)      | 0 (0%)       | 0 (0%)        | 0 (0%)        | $\chi^2(1) = 8.9, p = 0.002$ |
|                                                                                                                                     | Mean (SD)          | Intracranial meningioma       | 9 (56,2%)     | 0 (0%)        | 3 (75%)      | 3 (30%)      | 5 (62,5%)     | 10 (71,4%)    | $\chi^2(1) = 0.35, p = 0.55$ |
|                                                                                                                                     |                    | Intracranial Schwannoma       | 3 (18,7%)     | 0 (0%)        | 3 (75%)      | 3 (30%)      | 3 (37,5%)     | 7 (50%)       | $\chi^2(1) = 1.8, p = 0.17$  |
|                                                                                                                                     |                    | Spinal meningioma             | 5 (31,2%)     | 0 (0%)        | 1 (25%)      | 1 (10%)      | 3 (37,5%)     | 5 (45,5%)     | $\chi^2(1) = 0.10, p = 0.74$ |
|                                                                                                                                     |                    | Spinal Schwannoma             | 8 (50%)       | 0 (0%)        | 4 (100%)     | 6 (60%)      | 6 (75%)       | 11 (100%)     | $\chi^2(1) = 1.7, p = 0.17$  |
|                                                                                                                                     |                    | Spinal ependymoma             | 4 (25%)       | 0 (0%)        | 0 (0%)       | 2 (20%)      | 3 (37,5%)     | 5 (45,5%)     | $\chi^2(1) = 0.8, p = 0.35$  |
|                                                                                                                                     |                    | Total eye features            | 0 (0%)        | 0 (0%)        | 0 (0%)       | 0 (0%)       | 0 (0%)        | 0 (0%)        | $r_s(49) = 0.06, p = 0.67$   |
| Ocular Features                                                                                                                     | N (%)              | Epiretinal membranes          | 0 (0%)        | 0 (0%)        | 0 (0%)       | 0 (0%)       | 0 (0%)        | 0 (0%)        | NA                           |
|                                                                                                                                     |                    | Cataract                      | 3 (37,5%)     | 0 (0%)        | 1 (50%)      | 3 (30%)      | 1 (12,5%)     | 3 (42,9%)     | $\chi^2(1) = 0, p = 1$       |
|                                                                                                                                     |                    | Combined hamartoma            | 0 (0%)        | 0 (0%)        | 0 (0%)       | 0 (0%)       | 0 (0%)        | 2 (28,6%)     | $\chi^2(1) = 3.1, p = 0.07$  |
|                                                                                                                                     |                    | Optic nerve meningioma        | 0 (0%)        | 0 (0%)        | 0 (0%)       | 0 (0%)       | 1 (12,5%)     | 0 (0%)        | $\chi^2(1) = 0.3, p = 0.53$  |
|                                                                                                                                     |                    | Hearing Outcomes              | N (%)         | Hearing grade | 1 12 (75%)   | 0 (0%)       | 4 (100%)      | 3 (30%)       | 3 (37,5%)                    |
| Mean (SD)                                                                                                                           | N (%)              | 3 o 4                         | 2 1 (6,2%)    | 0 (0%)        | 0 (0%)       | 0 (0%)       | 0 (0%)        | 0 (0%)        | $\chi^2(1) = 1.5, p = 0.20$  |
|                                                                                                                                     |                    |                               | 0 (0%)        | 0 (0%)        | 0 (0%)       | 0 (0%)       | 2 (25%)       | 1 (7,1%)      | $\chi^2(1) = 2.1, p = 0.14$  |
|                                                                                                                                     |                    |                               | 5 2 (12,5%)   | 0 (0%)        | 0 (0%)       | 3 (30%)      | 1 (12,5%)     | 4 (28,6%)     | $\chi^2(1) = 1.6, p = 0.20$  |
|                                                                                                                                     |                    |                               | 6 2 (12,5%)   | 0 (0%)        | 0 (0%)       | 4 (40%)      | 2 (25%)       | 3 (21,4%)     | $\chi^2(1) = 0.6, p = 0.42$  |
| Cutaneous manifestations                                                                                                            | Mean (SD)          | Age of loss of useful hearing | 48,31 (17,16) | 0 (0%)        | 46,8 (18,43) | 32,38 (8,43) | 29,38 (11,89) | 26,23 (12,58) | $r_s(48) = -0.58, p < 0.001$ |
|                                                                                                                                     | N (%)              |                               | 4 (25%)       | 0 (0%)        | 0 (0%)       | 0 (0%)       | 4 (50%)       | 9 (75%)       | $\chi^2(1) = 6.2, p = 0.012$ |

\* For group 1 and 6, only 4 out 16 and 11 out of 14 patients, respectively, have been tested by a spinal magnetic resonance
