# Supplementary material for: Revisiting the UK Genetic Severity Score for NF2: a proposal for adding functional information
Source: bioRxiv or medRxiv preprint supplement (doi:10.1101/2020.10.22.20216614), 2020-10-26
Supplement: Supplementary file [file media-11.pdf]

**Supplementary Table 7. Major interventions in relation to Functional Genetic Severity Score**

| Functional Genetic Severity Score |                                                             | 1                           | 2             | 3            | 4            | 5             | 6            | Statistics                    |
|-----------------------------------|-------------------------------------------------------------|-----------------------------|---------------|--------------|--------------|---------------|--------------|-------------------------------|
| N (%)                             | Proportion of patients                                      | VS surgery                  | 6 (37,5%)     | 3 (60%)      | 9 (90%)      | 3 (37,5%)     | 10 (71,4%)   | $\chi^2(1) = 2.16, p = 0.14$  |
|                                   |                                                             | Non-VS intracranial surgery | 1 (6,3%)      | 1 (20%)      | 0 (0%)       | 3 (37,5%)     | 5 (35,7%)    | $\chi^2(1) = 4.5, p = 0.032$  |
|                                   |                                                             | Spinal surgery              | 3 (18,8%)     | 4 (80%)      | 1 (10%)      | 3 (37,5%)     | 2 (14,3%)    | $\chi^2(1) = 0.4, p = 0.51$   |
|                                   |                                                             | Shunt surgery               | 0 (0%)        | 0 (0%)       | 0 (0%)       | 0 (0%)        | 1 (7,1%)     | $\chi^2(1) = 1.5, p = 0.21$   |
|                                   |                                                             | Radiotherapy                | 1 (6,3%)      | 0 (0%)       | 3 (30%)      | 3 (37,5%)     | 8 (57,1%)    | $\chi^2(1) = 10.1, p = 0.001$ |
|                                   |                                                             | Bevacizumab                 | 0 (0%)        | 0 (0%)       | 2 (20%)      | 3 (37,5%)     | 6 (42,9%)    | $\chi^2(1) = 9.6, p = 0.002$  |
|                                   | Total number of major interventions per person, grouped     | 0                           | 8 (50%)       | 0 (0%)       | 0 (0%)       | 0 (0%)        | 2 (14,3%)    | $\chi^2(1) = 7.1, p = 0.007$  |
|                                   |                                                             | 1                           | 3 (18,8%)     | 3 (60%)      | 2 (20%)      | 2 (25%)       | 2 (14,3%)    | $\chi^2(1) = 0.4, p = 0.51$   |
|                                   |                                                             | 2                           | 2 (12,5%)     | 1 (20%)      | 4 (40%)      | 1 (12,5%)     | 2 (14,3%)    | $\chi^2(1) = 0.03, p = 0.86$  |
|                                   |                                                             | 3                           | 1 (6,3%)      | 0 (0%)       | 4 (40%)      | 0 (0%)        | 2 (14,3%)    | $\chi^2(1) = 0.22, p = 0.63$  |
|                                   |                                                             | 4 or more                   | 2 (12,5%)     | 1 (20%)      | 0 (0%)       | 4 (50%)       | 6 (42,9%)    | $\chi^2(1) = 4.5, p = 0.033$  |
| Mean (SD)                         | Total number of major interventions per person, grouped     |                             | 1,25 (1,77)   | 2 (1,73)     | 2,22 (0,83)  | 3,63 (2,50)   | 3,79 (3,36)  | $r_s(50) = 0.39, p = 0.003$   |
|                                   | Number of total surgeries                                   |                             | 1,19 (1,80)   | 2,2 (2,17)   | 1,67 (0,50)  | 2,13 (1,89)   | 2,64 (2,98)  | $r_s(50) = 0.22, p = 0.11$    |
|                                   | Age at first radiotherapy session                           |                             | 23            | 0            | 37 (9,64)    | 30,33 (6,66)  | 24,29 (8,16) | $r_s(12) = -0.42, p = 0.13$   |
|                                   | Age started bevacizumab                                     |                             | 0             | 0            | 32           | 26,67 (14,57) | 23,67 (8,48) | $r_s(8) = -0.26, p = 0.46$    |
|                                   | Age at first surgery                                        |                             | 36,71 (13,90) | 34,8 (10,62) | 25,67 (7,55) | 27,50 (11,93) | 20,80 (7,73) | $r_s(35) = -0.51, p = 0.001$  |
|                                   | Age at first major intervention                             |                             | 35,00 (13,75) | 34,8 (10,62) | 25,67 (7,55) | 25,75 (11,93) | 20,55 (7,89) | $r_s(39) = -0.51, p < 0.001$  |
|                                   | Ratio of total number of major interventions to current age |                             | 0,03 (0,04)   | 0,04 (0,02)  | 0,05 (0,02)  | 0,10 (0,06)   | 0,13 (0,11)  | $r_s(50) = 0.54, p < 0.001$   |
