# Supplementary material for: Revisiting the UK Genetic Severity Score for NF2: a proposal for adding functional information
Source: bioRxiv or medRxiv preprint supplement (doi:10.1101/2020.10.22.20216614), 2020-10-26
Supplement: Supplementary file [file media-12.pdf]

**Supplementary Table 8. Intragroup Variability of Merlin, pERK, age at diagnosis and age at hearing loss.**

| Score                              | GSS    |        |        |       |         | FGSS   |        |       |        |        |        |
|------------------------------------|--------|--------|--------|-------|---------|--------|--------|-------|--------|--------|--------|
|                                    | 1      | 2A     | 2B     | 3     | Mean    | 1      | 3      | 4     | 5      | 6      | Mean   |
| Merlin Protien Levels ( $\sigma$ ) | 3,11   | 0,54   | 0,29   | 0,12  | 1,02    | 1,76   | 2,01   | 0,27  | 0,55   | 0,12   | 0,94   |
| pERK Protien Levels( $\sigma$ )    | 6,88   | 3,99   | 5,43   | 0,54  | 4,21    | 3,54   | 3,27   | 2,01  | 0,44   | 0,34   | 1,92   |
| Age at diagnosis ( $\sigma$ )      | 216,97 | 169,78 | 99,46  | 33,27 | 129,87  | 202,77 | 149,08 | 54,29 | 182,25 | 35,62  | 124,80 |
| Age at hearing loss ( $\sigma$ )   | 324,72 | 144    | 110,88 | 148,1 | 181,925 | 262,11 | 365,19 | 71,47 | 148,35 | 117,93 | 193,01 |
