# Supplementary material for: Revisiting the UK Genetic Severity Score for NF2: a proposal for adding functional information
Source: bioRxiv or medRxiv preprint supplement (doi:10.1101/2020.10.22.20216614), 2020-10-26
Supplement: Supplementary file [file media-13.pdf]

**Supplementary Table 9A. FGSS and NF2 disease-causing variant regression model**

|                  | Model 1 (N=52) |       |             |          | Model 2 (N=27) |       |             |       |
|------------------|----------------|-------|-------------|----------|----------------|-------|-------------|-------|
|                  | beta           | se    | t           | p        | beta           | se    | t           | p     |
| <b>Intercept</b> | 5062           | 0.519 | 9739        | 7.46e-13 | 5141           | 18612 | 2762        | 0.012 |
| <b>Type 3</b>    | 2187           | 1162  | 1882        | 0.066    |                |       |             |       |
| <b>Type 4</b>    | 3080           | 0.942 | 3269        | 0.002    | 2419           | 14691 | 1647        | 0.116 |
| <b>Type 5</b>    | 2837           | 0.838 | 3385        | 0.001    | 2035           | 13829 | 1472        | 0.157 |
| <b>Type 6</b>    | 3804           | 0.747 | 5091        | 6.18e-06 | 3352           | 13817 | 2426        | 0.025 |
| <b>pERK</b>      |                |       |             |          | -0.135         | 0.241 | -0.562      | 0.580 |
| <b>NF2</b>       |                |       |             |          | 0.786          | 0.499 | 1574        | 0.132 |
|                  |                |       | $R^2=0.381$ | 0.0001   |                |       | $R^2=0.143$ | 0.161 |

The outcome in both models is FGSS. The patients in Model 2 only have mutations of type 3, 4, 5 and 6. Then, the base category of this model is Type 3.

**Supplementary Table 9B. GSS and NF2 disease-causing variant regression model**

|                  | Model GSS (N=52) |       |             |         |
|------------------|------------------|-------|-------------|---------|
|                  | beta             | se    | t           | p       |
| <b>Intercept</b> | 5428             | 0.565 | 9603        | 2.3e-12 |
| <b>1B</b>        | 1904             | 1345  | 1415        | 0.163   |
| <b>2A</b>        | 1349             | 0.903 | 1493        | 0.142   |
| <b>2B</b>        | 3207             | 0.852 | 3764        | 0.0004  |
| <b>3</b>         | 3238             | 0.832 | 3891        | 0.0003  |
|                  |                  |       | $R^2=0.322$ | 0.001   |

The outcome in the model is GSS.
